# Supplementary material
Source: Springer Nature journal article supplement (https://www.springermedizin.de/resource/supplementary/12885_2011_2872_MOESM1_ESM.pdf/9462180)

## INTERVENTION

### **Prosocial Online Support Group**

Increases group members' helping behaviors through blogging, outreach, homework, and by facilitator coaching, modeling, and reinforcing helping behaviors.

## MEDIATORS

**Self-Esteem**

**Positive Affect**

**Belonging/Mattering**

## OUTCOMES

**Psychological Symptomatology**

Depression/Anxiety

**Purpose/Meaning**

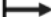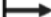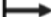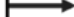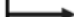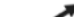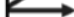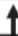

Supplement: MOESM1 [file 9462180]
